# Supplementary material
Source: publisher figshare collection journal article supplement (https://geolsoc.figshare.com/ndownloader/files/24065062)
Supplement: Supplementary file 1 [file 24065062]

## Sheet: Sheet1
	SIO2	AL2O3	FE2O3	MGO	CAO	NA2O	K2O	TIO2	MNO	P2O5	SO3	Total			LOI		Ni	Co	Cr	V	Sc	Cu	Zn	As	S	F	Cl	Br	Ga	Pb	Sr	Rb	Ba	Zr	Nb	Ta	Mo	Th	U	Y	La	Ce	Nd	Sm	Yb	Hf	Cs		tracesum
SW15-12	50.91	13.2817	13.1416	8.15334	10.1692	1.44666	0.387217	1.13916	0.227926	0.0858446	0.0294406	98.9721			1.56		79.6877	54.5229	173.219	345.088	50.6486	98.084	241.753	1.68291	281.242	206.709	229.571	0.470711	14.5922	11.233	304.899	5.76137	96.4881	60.9385	3.02477	-0.320289	0.290118	0.640169	0.257604	22.6265	5.01507	10.2283	8.94346	2.7382	2.64398	1.9928	1.65566		0.265085
AB08-11	63.2313	15.3887	7.2725	2.86324	0.780385	1.92881	3.28461	0.797004	0.103765	0.152345	0.0537497	95.8564			-0.73		40.5296	16.0471	74.171	100.69	15.7079	23.3608	92.7575	1.8386	49.6204	840.636	207.911	0.90604	21.0437	15.217	94.4134	121.706	535.403	181.408	11.6829	0.708973	0.433373	11.2987	2.70308	36.8331	12.3477	76.073	18.3562	5.51312	4.45391	4.63276	4.85491		0.295299
AB08-12	50.5	15.8	14.2	4	9.3	3.5	0.180549	1.65	0.2	0.2	0.0114885	99.542			1.1		42.6884	37.609	122.891	351.136	45.4325	41.0639	108.306	1.85723	89.3642	239.934	274.726	0.737049	18.2511	3.86847	108.373	7.61756	130.546	148.04	6.61497	0.791789	0.59474	1.48542	0.953686	43.5182	10.5161	25.6975	14.7424	2.50259	5.55459	2.78529	1.01976		0.226817
SW13-08	50.4136	15.3024	10.4301	8.69751	9.32173	2.41723	0.615468	0.848806	0.167726	0.0791878	0.0312223	98.3249			-1.12		174.102	47.14	358.344	219.421	36.0705	36.5183	80.1549	1.27701	54.4896	272.721	194.142	0.299916	14.996	3.49153	124.404	10.2525	120.52	71.4281	3.09413	-0.692099	0.288282	2.11253	0.977724	23.7044	5.98669	14.7353	7.14025	4.83967	1.85663	1.42292	0.890975		0.234393
SW15-01	68.403	15.2199	5.54098	1.5179	1.56922	2.86983	2.67814	0.802038	0.127135	0.0910455	0.0179029	98.8372			1.44		34.9206	5.61557	77.3967	84.7663	11.0556	24.06	56.0383	0.527783	201.758	469.314	76.1853	0.469305	18.9815	17.6725	282.168	90.4226	665.897	270.291	22.5553	1.64885	0.633309	8.8334	1.72308	20.1247	19.1935	51.3878	21.2066	4.69274	1.60739	7.30587	1.63749		0.280127
SW15-03	65.3439	15.8909	6.87469	2.20638	1.73439	2.80062	2.855	0.940937	0.159777	0.17414	0.0118006	98.9925			2		42.8081	11.6903	100.967	104.714	12.4251	40.4058	51.155	0.563979	110.565	643.683	121.982	0.871486	20.9528	18.4175	234.183	83.5313	782.79	354.542	24.9922	0.762518	0.188823	11.9222	1.48586	27.7475	22.0561	73.3831	26.1913	3.96199	2.8313	8.68718	1.19796		0.332802
SW15-05	49.0799	13.1976	15.0329	5.90966	10.7119	2.54519	0.606798	1.92828	0.252496	0.585226	0.0236134	99.8735			0.39		59.2725	39.3519	159.245	273.008	44.8219	119.023	192.46	0.732469	1238.06	568.182	458.787	0.678227	19.6337	27.3852	289.609	9.30728	267.663	175.624	11.0357	0.503368	0.604408	1.20926	0.281791	44.0575	16.0972	36.3006	24.5524	6.8016	3.86928	4.84768	0.516035		0.346706
SW15-06	65.7716	15.2535	6.22127	1.91897	2.96798	4.04139	1.36128	0.938852	0.12849	0.237919	0.0073319	98.8485			0.81		24.5838	21.9785	50.6845	94.0548	14.5984	6.47491	24.8396	0.594348	41.385	368.286	96.7647	0.349252	16.6515	5.87006	482.71	39.4916	397.891	302.576	16.8976	1.1773	0.288118	15.5487	2.58024	53.5529	55.7842	118.71	56.2013	13.0627	4.78061	7.16384	0.711618		0.27303
SW13 27	61	18	8.53836	2	4	2	3	1	0.2	0.3	0	100.038			1		80.1028	27.9953	150.839	131.428	18.9299	32.0087	77.5933	1.62949	355.261	492.761	205.056	1.21709	21.8163	14.0944	247.813	81.5756	625.918	127.396	9.78823	-0.164654	-0.375551	7.60051	0.848326	22.8571	9.41137	46.6884	12.2728	2.96565	1.90688	3.79077	1.75353		0.28583
AB08-18	49.285	14.1004	16.0843	6.34856	8.78541	0.67749	0.97825	2.61465	0.214661	0.22095	0.0686004	99.3782			0.01		69.8821	43.8192	189.763	447.687	51.1065	75.7599	164.138	4.08352	1618.78	1235.29	1130.17	1.46112	22.7327	5.42802	65.7855	34.7238	93.8328	179.888	8.55317	0.311273	0.383774	2.34359	1.43533	52.6025	15.9942	40.7201	25.665	7.58	5.10436	3.39223	1.71386		0.480116
AB08-14	58.6385	19.8233	10.5222	3.07691	1.63801	1.58126	2.61247	0.98478	0.12886	0.0283973	0.111805	99.1465			-1.02		75.101	19.683	132.54	139.83	24.3851	94.4564	89.2786	0.972804	2926.73	804.131	194.691	0.546598	24.8304	11.8562	82.7069	96.3641	944.654	186.444	19.0757	0.445646	0.523143	5.85909	1.3205	48.4152	15.8363	32.0224	15.0118	2.36939	4.67597	4.1218	1.57763		0.394741
AB08-15	54.9455	28.141	9.21831	2.29451	0.53642	0.459978	2.50313	1.16856	0.147097	0.126345	0.0425062	99.5833			1.19		61.8121	13.9024	173.782	146.573	22.3906	28.1265	140.909	0.698885	213.502	608.452	70.363	0.457901	36.4912	22.3062	111.924	105.715	552.122	162.925	18.4435	0.267799	0.247569	17.8772	1.94314	23.8438	20.8733	50.3319	23.3746	4.60104	3.73034	3.68189	4.56569		0.30243
SW12-16	51.407	27.6736	5.82663	0.818953	0.532937	2.2981	3.39553	0.950481	0.0573035	0.15122	0.00887579	93.1206			3.72		27.1745	17.2892	165.837	115.753	20.5602	24.2736	131.947	0.79874	11.3078	502.206	44.9968	0.310975	34.1353	33.7441	264.179	137.923	732.367	143.172	13.8301	1.47246	0.201109	14.7254	3.32913	11.1377	24.5028	43.5493	18.1111	4.05623	1.58002	5.3433	3.18673		0.297886
SW12-14	64.4438	16.7552	7.08028	2.10513	1.4983	3.07252	2.67859	0.921781	0.190362	0.11852	0.0621039	98.9266			1.8		50.0872	20.8259	111.274	127.856	15.3549	7.18086	95.0627	2.08149	278.058	672.374	171.278	0.29671	22.8332	20.0171	275.038	95.8133	649.854	249.314	23.4203	0.588589	0.219218	13.2875	1.6485	22.861	35.7636	69.5119	31.8731	6.35768	2.25024	6.03858	2.43913		0.348545
SW15-07	40.3741	13.5997	18.0939	6.79772	14.3544	1.09629	0.520286	3.13744	0.417063	0.368127	0.0611147	98.8202			1.58		66.4366	47.0877	141.868	674.111	60.7946	41.8108	133.779	9.81235	142.443	478.89	293.894	0.316994	17.1347	0.991875	73.1626	4.0728	49.7631	84.008	13.3073	1.79124	0.567019	1.13263	2.50328	70.7422	8.65016	16.8017	15.9612	8.96103	7.03477	2.23415	0.4925		0.30484
[truncated: 5 more columns]
